# Supplementary material
Source: publisher figshare collection journal article supplement (https://acs.figshare.com/ndownloader/files/3870307)
Supplement: Supplementary file 1 [file 3870307]

# SUPPORTING INFORMATION

## Inhalable constituents of thirdhand tobacco smoke: Chemical characterization and health impact considerations

*Mohamad Sleiman<sup>1,2,3,\*</sup>, Jennifer M. Logue<sup>1</sup>, Wentai Luo<sup>4</sup>,*

*James F. Pankow<sup>4</sup>, Lara A. Gundel<sup>1</sup> and Hugo Destailats<sup>1,\*</sup>*

1. Indoor Environment Group, Lawrence Berkeley National Laboratory, Berkeley, California, USA.
2. Clermont Université, ENSCCF, Institut de Chimie de Clermont-Ferrand, BP 10448, F-63000, Clermont-Ferrand, France
3. CNRS, UMR 6296, ICCF, BP 80026, F-63177 Aubière, France
4. Chemistry Department, Portland State University, Portland, Oregon.

\* Corresponding authors: Hugo Destailats and Mohamad Sleiman

Address: 1 Cyclotron Road, MS70-108B, Berkeley, CA 94720

Emails: [HDestailats@lbl.gov](mailto:HDestailats@lbl.gov) ; [MSleiman@lbl.gov](mailto:MSleiman@lbl.gov)

Phone: (510) 486-5897; Fax: (510) 486-7303

| <b>Table of Contents</b>                                                                                    | <b>Page</b> |
|-------------------------------------------------------------------------------------------------------------|-------------|
| <b>S1. Methods</b>                                                                                          | <b>S3</b>   |
| S1.1. Operation of the smoking machine                                                                      | S3          |
| S1.2. Chromatographic conditions                                                                            | S3          |
| TABLE 1S: Summary of the GCxGC-TOF MS conditions used in this study                                         | S4          |
| S1.3. Gravimetric determination of PM <sub>2.5</sub>                                                        | S4          |
| S1.4. Mass balance modeling                                                                                 | S5          |
| FIGURE 1S: An example of model extrapolation for PM 2.5.                                                    | S5          |
| FIGURE 2S: Typical PM 2.5 weekly concentration profiles for scenarios in which the smoker is home and away. | S6          |
| S1.5. Computation of DALYs                                                                                  | S6          |
| TABLE 2S: SHS/THS constituents included in the DALY calculation                                             | S7          |
| <b>S2. Results and Discussion</b>                                                                           | <b>S8</b>   |
| S2.1. VOCs and PM <sub>2.5</sub> in aged tobacco smoke                                                      | S8          |
| TABLE 3S: Concentrations of VOCs measured in the LBNL chamber                                               | S8          |
| TABLE 4S: Tobacco smoke VOC chamber levels reported in the literature                                       | S10         |
| TABLE 5S: Tobacco smoke VOC field measurements reported in the literature                                   | S15         |
| <b>REFERENCES</b>                                                                                           | <b>S18</b>  |

## **S1. Methods**

### **S1.1. Operation of the smoking machine**

Since real-world SHS includes about 15% exhaled mainstream smoke, the diluted sidestream smoke used in this study is best described as simulated SHS. The brands of cigarettes chosen for the laboratory study were Marlboro Special Blend (gold pack) and filtered Camel 99s, to match those used by the smoker whose home was monitored. Three cigarettes of each brand were mounted in alternating order into a laboratory-built multi-port programmable ignition system that was connected to a smoking machine (ADL/II, AD Little, Cambridge, MA). The cigarettes were smoked sequentially with one 35-mL puff every minute, until the burning cone was 1.0 cm from the filter. The sidestream smoke dispersed quickly into the chamber air, and the mainstream smoke was vented to the outdoors.

### **S1.2. Chromatographic conditions**

Peaks were identified using authentic standards (for benzene, ethylbenzene, *m*-ethyl toluene, *p*-xylene, propylbenzene, *o*-xylene, *p*-ethyltoluene, styrene, toluene, acetone, chloromethane, dichloromethane and isoprene). Others were tentatively identified by searching the NIST mass spectral library. Concentrations of tentatively identified compounds were estimated based on peak areas relative to the internal standard (toluene- $d_8$ ). Quantification was carried out using fluorobenzene and toluene- $d_8$  as internal standards. Total VOC concentrations were calculated for all compounds with equivalent toluene- $d_8$  concentrations higher than  $0.1 \mu\text{g m}^{-3}$ . The chromatographic conditions used in this study are summarized in Table 1S.

**TABLE 1S: Summary of the GCxGC-TOF MS conditions used in this study**

| Parameter                     | Condition                                                                                      |
|-------------------------------|------------------------------------------------------------------------------------------------|
| ATD cartridge desorption      | 300 °C for 10 min at 45 mL/min with inlet split of 10 mL/min                                   |
| Secondary trap                | Perkin-Elmer “air toxics trap”; outlet split was off                                           |
| Trap temperature              | 10 °C                                                                                          |
| Trap higher temperature       | 325 °C for 3 min                                                                               |
| ATD transfer line temperature | 225 °C                                                                                         |
| GC Injector                   | 225 °C; split 8:1                                                                              |
| Column flow                   | 1.6 mL/min                                                                                     |
| Primary column                | DB-VRX, 60 m, 0.25 mm I.D., 1.4 µm film (Agilent, Santa Clara, CA)                             |
| Secondary column              | Stabilwax, 2 m, 0.25 mm I.D., 0.25 µm film (Restek, Bellefonte, PA)                            |
| Primary GC oven program       | 50 °C hold for 5 min, 4 °C/min to 190 °C, then 5 °C/min to 235 °C and hold at 235 °C for 8 min |
| Secondary GC oven program     | 5 °C above the primary GC oven                                                                 |
| GCxGC modulator               | 15 °C above the primary GC oven                                                                |
| GCxGC modulation              | 4 s period, 0.8 s hot pulse                                                                    |
| GC transfer line temperature  | 240 °C                                                                                         |
| MS source                     | 200 °C, electron impact (70 eV)                                                                |
| MS detector                   | 1600 V                                                                                         |
| MS data acquisition           | 200 spectra/s; 34 to 400 amu                                                                   |

### **S1.3. Gravimetric determination of PM<sub>2.5</sub>.**

Teflon-coated fiberglass filters chosen because their Teflon coating is less susceptible to adsorption artifacts than uncoated fiberglass, and its mesh of coated fibers leads to smaller pressure drops than most types of Teflon membrane filters. Before and after use, the filters were equilibrated at 23 °C and 35 % RH for 24 h in moving air, then weighed on a microbalance (Sartorius SE-2F, Goettingen, Germany). Mass amounts on the downstream filters were about 5% of those on the upstream filters which is consistent with the manufacturer’s measurements of particle breakthrough of

0.3  $\mu\text{m}$  diameter particles. That size is close to the mass median diameter estimated for SHS, 0.15 to 0.25  $\mu\text{m}$  [11], depending on the aging time [12].

#### S1.4. Mass balance modeling

Concentration profiles such as those illustrated in Figure 1S (Supp. Info.) were generated for each pollutant in each scenario.

**FIGURE 1S: An example of model extrapolation for PM 2.5.** Concentrations correspond to emissions by a single cigarette, diluted into a 380 m<sup>3</sup> home.

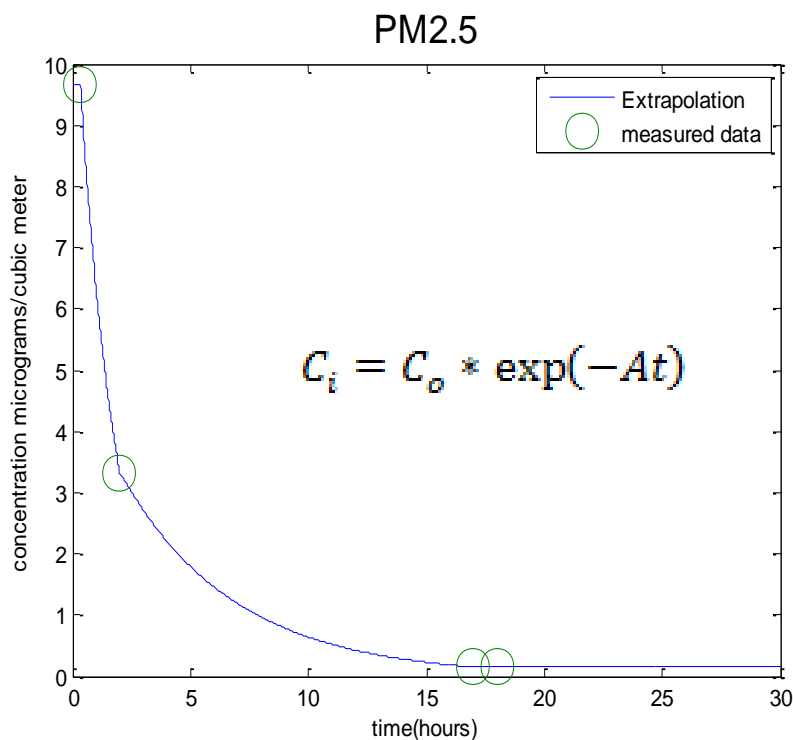

Using the concentration vs. time profiles for one cigarette, we used superposition to determine the impact of smoking 28 cigarettes daily at regular time intervals [13]. Since

deposition and desorption rates in the chamber are a function of surface-to-volume ratio and air velocity in the room, the predicted concentrations constitute first-order approximations. Typical predicted weekly concentration profiles for scenarios in which the smoker is home and away are shown in Figure 2S (Supp. Info).

**FIGURE 2S: Typical PM 2.5 weekly concentration profiles for scenarios in which the smoker is home and away.**

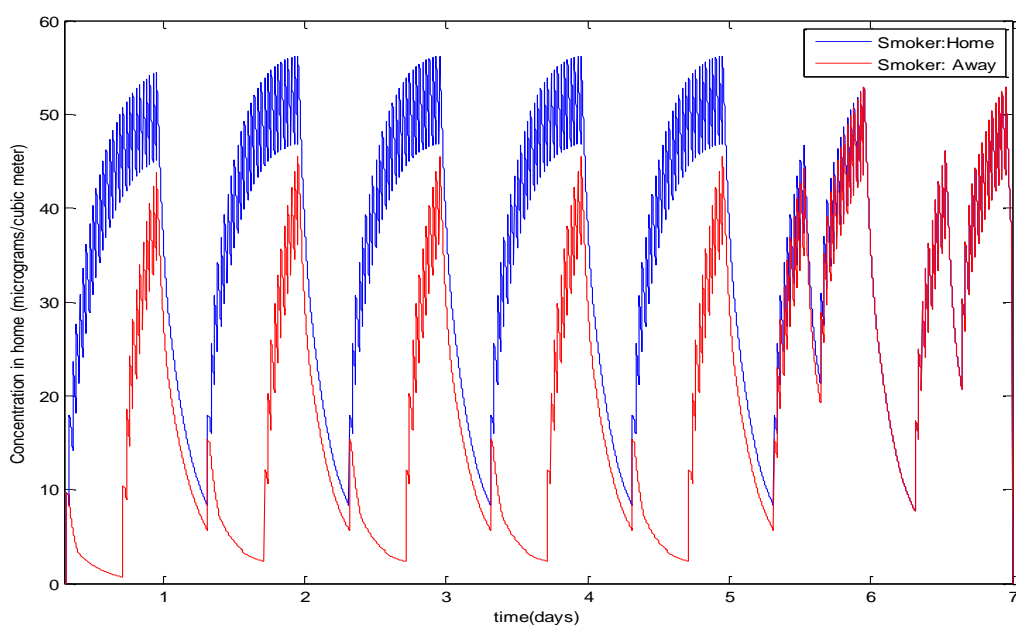

### S1.5. Computation of DALYs

Damage factors for PM<sub>2.5</sub> are estimated from epidemiology-based concentration-response functions and published estimates of the DALYs lost per disease. Damage factors have high uncertainties largely due to uncertainties in concentration response functions. Confidence intervals are larger for VOCs because of uncertainties in extrapolating from animal-based toxicology results to human health impacts.

**TABLE 2S: SHS/THS constituents included in the DALY calculation**

| <b>SHS/THS constituent</b> | <b>CAS number</b> | <b>Health Effect</b> |
|----------------------------|-------------------|----------------------|
| 1,3-Butadiene              | 106-99-0          | C&NC                 |
| 1-Hexanol, 2-ethyl-        | 104-76-7          | C                    |
| 1-Propene, 2-methyl-       | 115-11-7          | C                    |
| 2-Butanone                 | 78-93-3           | NC                   |
| 2-Butenal, (E)-            | 123-73-9          | C                    |
| Acrylonitrile              | 107-13-1          | C&NC                 |
| Acetaldehyde               | 75-07-0           | C&NC                 |
| Acetonitrile               | 75-05-8           | NC                   |
| Acrolein                   | 107-02-8          | NC                   |
| Benzaldehyde               | 100-52-7          | C                    |
| Benzene                    | 71-43-2           | C&NC                 |
| Benzene, (1-methylethyl)-  | 98-82-8           | NC                   |
| Ethyl alcohol              | 64-17-5           | C                    |
| Ethyl benzene              | 100-41-4          | C&NC                 |
| Furan                      | 110-00-9          | C                    |
| Furan, tetrahydro-         | 109-99-9          | C                    |
| Hexane                     | 110-54-3          | NC                   |
| isoprene                   | 78-79-5           | C                    |
| Methane, chloro-           | 74-87-3           | NC                   |
| Methylene Chloride         | 75-09-2           | C                    |
| PM2.5                      | N/A               | NC                   |
| Styrene                    | 100-42-5          | C&NC                 |
| Toluene                    | 108-88-3          | C&NC                 |

C = cancer

NC = non-cancer

## S2. Results and Discussion

### S2.1. VOCs and PM<sub>2.5</sub> in aged tobacco smoke

Table 3S summarizes concentrations of VOCs measured in the LBNL chamber

**TABLE 3S: Concentrations of VOCs measured in the LBNL chamber**

| <b>Nitrogenated Compounds</b> |                   |               |           |            |
|-------------------------------|-------------------|---------------|-----------|------------|
| <b>Code</b>                   | <b>Name</b>       | <b>20 min</b> | <b>2h</b> | <b>18h</b> |
| NC1                           | 3-Ethenylpyridine | 6.3           | 1.0       | nd         |
| NC2                           | 2-Ethenylpyridine | 2.4           | nd        | nd         |
| NC3                           | 2- & 3-Picoline   | 78.0          | nd        | nd         |
| NC4                           | 3-Ethylpyridine   | 7.1           | nd        | nd         |
| NC5                           | Myosmine          | 1.5           | nd        | nd         |
| NC7                           | Nicotine          | 48.9          | nd        | nd         |
| NC8                           | Pyridine          | 119.2         | nd        | nd         |
| NC10                          | Pyrrole           | 61.4          | nd        | nd         |
| NL1                           | Acetonitrile      | 73.0          | 278.0     | 19.5       |
| NL2                           | Acrylonitrile     | 100.2         | 4.2       | 2.2        |
| NL3                           | Propanenitrile    | 57.9          | 0.8       | 0.9        |

| <b>Aromatics (AR)</b> |                   |               |           |            |
|-----------------------|-------------------|---------------|-----------|------------|
| <b>Code</b>           | <b>Name</b>       | <b>20 min</b> | <b>2h</b> | <b>18h</b> |
| AR5                   | 2,5-Dimethylfuran | 95.8          | 13.5      | 3.8        |
| AR7                   | Benzene           | 263.5         | 77.0      | 14.5       |
| AR8                   | Ethylbenzene      | 108.5         | 10.1      | 4.7        |
| AR9                   | Furan             | 261.3         | 27.6      | 5.6        |
| AR10                  | Furan, 2-methyl   | 227.1         | 23.9      | 4.5        |
| AR11                  | Iso-Propylbenzene | 9.0           | 1.1       | 0.3        |
| AR12                  | m-Ethyltoluene    | 80.2          | 4.5       | 3.2        |
| AR13                  | m,p-Xylene        | 288.5         | 37.8      | 14.8       |
| AR14                  | Naphthalene       | 3.8           | 0.6       | 0.3        |
| AR16                  | n-Propylbenzene   | 18.9          | 1.1       | 0.8        |
| AR17                  | o-Ethyltoluene    | 15.8          | 2.9       | 2.6        |
| AR18                  | o-Xylene          | 81.1          | 32.0      | 3.4        |
| AR19                  | p-Ethyltoluene    | 23.0          | 2.9       | 0.6        |
| AR21                  | Styrene           | 129.0         | 7.5       | 0.2        |
| AR23                  | Toluene           | 226.7         | 125.4     | 15.7       |



**Carbonyls (CB) and Chlorinated VOCs (CL)**

| <b>Code</b> | <b>Name</b>     | <b>20 min</b> | <b>2h</b> | <b>18h</b> |
|-------------|-----------------|---------------|-----------|------------|
| CB1         | 2,3-Butanedione | 68.5          | 2.7       | 0.6        |
| CB2         | 2-Butanone      | 19.3          | 5.7       | 3.6        |
| CB3         | Acetaldehyde    | 230.0         | 21.2      | 3.4        |
| CB4         | Acetone         | 244.5         | 49.1      | 25.0       |
| CB5         | Acetophenone    | 4.3           | nd        | 0.1        |
| CB6         | Acrolein        | 127.9         | 7.0       | 2.4        |
| CB7         | Benzaldehyde    | 26.1          | 1.8       | 1.2        |
| CB9         | Methacrolein    | 90.7          | 6.4       | nd         |
| CB10        | MEK             | 116.9         | 3.8       | 2.1        |
| CL1         | Chloromethane   | 28.1          | 7.1       | 0.4        |
| CL2         | Dichloromethane | 32.7          | 24.3      | 6.4        |

**Alkanes (KA), Alkenes (KE) and Terpenes (TP)**

| <b>Code</b> | <b>Name</b>    | <b>20 min</b> | <b>2h</b> | <b>18h</b> |
|-------------|----------------|---------------|-----------|------------|
| KA1         | Butane         | 62.7          | 180.4     | 13.7       |
| KA2         | Isobutane      | 82.7          | 46.6      | 7.3        |
| KA3         | n-Decane       | 23.0          | 1.7       | 2.7        |
| KA5         | n-Nonane       | 22.0          | 2.1       | 2.0        |
| KE1         | 1,3-Butadiene  | 122.4         | 34.0      | 3.9        |
| KE2         | 1,3-Pentadiene | 100.2         | 13.0      | 2.5        |
| KE4         | 1-Butene       | 109.9         | 73.3      | 4.0        |
| KE5         | 1-Nonene       | 51.1          | 3.2       | 2.3        |
| KE6         | 1-Octene       | 60.0          | 5.2       | 2.4        |
| TP1         | d-Limonene     | 110.9         | 15.4      | nd         |
| TP2         | Isoprene       | 273.3         | 265.5     | 32.2       |

Table 4S summarizes concentrations and emission factors of VOCs and other pollutants present in SHS, as measured in laboratory chambers.

TABLE 4S: Tobacco smoke VOC chamber levels reported in the literature

| CODE                | ANALYTE           | MW    | GAS PHASE CONCENTRATIONS (µg/m³) |            |      |         |     | EMISSION FACTORS (µg/cigarette) |          |       |         |     |
|---------------------|-------------------|-------|----------------------------------|------------|------|---------|-----|---------------------------------|----------|-------|---------|-----|
|                     |                   |       | Mean                             | range      | SD   | RSD (%) | Ref | mean                            | range    | SD    | RSD (%) | Ref |
| CRITERIA POLLUTANTS |                   |       |                                  |            |      |         |     |                                 |          |       |         |     |
|                     | PM2.5             |       | 12130                            | 7420–16000 |      | 23.5    | [1] | 17900                           |          |       | 2       | [2] |
|                     |                   |       | 2530                             |            |      |         | [3] |                                 |          |       |         |     |
|                     |                   |       | 900                              | 400-1400   |      | 111     | [3] |                                 |          |       |         |     |
|                     | RSP               |       | 1439                             |            | 42   |         | [4] | 13674                           |          | 411.0 |         | [4] |
|                     | CO                |       | 11 ppm                           | 9–12 ppm   |      | 11      | [1] |                                 |          |       |         |     |
|                     |                   |       | 5845                             |            | 113  |         | [4] | 55101                           |          | 1064  |         | [4] |
|                     | NOx               |       | 195                              |            | 3.2  |         | [4] | 1801                            |          | 32    |         | [4] |
| AMINES              |                   |       |                                  |            |      |         |     |                                 |          |       |         |     |
| NC1                 | 3-ethenylpyridine | 105.4 | 10.5                             | 8–14       |      | 20.8    | [1] | 174.4                           |          |       | 33.6    | [2] |
|                     |                   |       |                                  | 2-16       |      |         | [5] | 380.0                           | 272-428  | 30    |         | [5] |
|                     |                   |       |                                  |            |      |         |     | 660                             | 450-890  |       | 23.0    | [6] |
|                     |                   |       | 20.7                             |            |      |         | [3] |                                 |          |       |         |     |
|                     |                   |       | 11.2                             | 9-13       |      | 39      | [3] |                                 |          |       |         |     |
|                     |                   |       | 37.1                             |            | 2    |         | [4] | 333                             |          | 7.8   |         | [4] |
| NC8                 | Nicotine          | 162.3 | 25.0                             | 8.5–46     |      | 49.4    | [1] | 241                             |          |       | 85.0    | [2] |
|                     |                   |       |                                  | 4.9-64     |      |         | [5] | 689                             | 396-1270 | 50.0  |         | [5] |
|                     |                   |       | 982                              |            |      |         | [3] |                                 |          |       |         |     |
|                     |                   |       | nd                               |            |      |         | [3] |                                 |          |       |         |     |
|                     |                   |       | 90.8                             |            | 0.11 |         | [4] | 1585                            |          | 42.0  |         | [4] |
| NC10                | pyridine          | 79    |                                  | 1.6-16     |      |         | [5] | 348                             | 292-364  | 22    |         | [5] |
|                     |                   |       |                                  |            |      |         |     | 430                             | 340-670  |       | 29.0    | [6] |
|                     |                   |       | 28.8                             |            |      |         | [3] |                                 |          |       |         |     |

|                              |                      |     |      |         |      |     |       |         |      |     |
|------------------------------|----------------------|-----|------|---------|------|-----|-------|---------|------|-----|
| NC7                          | myosmine             | 146 | 4.9  | 5       | 4    | [3] | 278.0 | 25-83   | 6.9  | [4] |
|                              |                      |     | 29.8 |         | 0.68 | [4] |       |         |      |     |
|                              |                      |     |      | 0.3-3.1 |      | [5] |       |         |      |     |
|                              |                      |     | 13.6 |         |      | [3] |       |         |      |     |
|                              |                      |     | 2.6  | 1.0-4.1 | 120  | [3] |       |         |      |     |
| NC11                         | pyrrole              | 67  | 5.4  |         | 0.8  | [4] | 49    |         | 1.2  | [4] |
|                              |                      |     |      |         |      |     | 400   | 330-570 | 22   | [6] |
|                              |                      |     | 56.3 |         |      | [3] | 231   | 157-230 | 23   | [5] |
|                              |                      |     | 16.3 | 10-22.6 | 75   | [3] |       |         |      |     |
|                              |                      |     | 28.6 |         |      | [3] |       |         |      |     |
| NC6                          | N-methylformamide    | 59  | 10.8 | 6-15.5  | 81   | [3] |       |         |      |     |
| NC9                          | ammonia              | 17  | 453  |         | 11.3 | [4] | 4148  |         | 107  | [4] |
| NC3,5                        | picoline (2- and 3-) | 93  | 34.5 |         | 1.12 | [4] | 321   |         | 11   | [4] |
|                              |                      |     |      |         |      |     | 338   | 260-390 | 20   | [5] |
| NC2                          | ethenylpyridine      | 103 | 59.8 |         | 2.13 | [4] | 539   |         | 19   | [4] |
| NC4                          | ethylpyridine        | 107 | 16.9 |         | 0.47 | [4] | 154   |         | 4.6  | [4] |
| <b>AROMATIC HYDROCARBONS</b> |                      |     |      |         |      |     |       |         |      |     |
| AR7                          | Benzene              | 78  | 45.3 | 23-79   | 42   | [1] | 422   |         | 32   | [2] |
|                              |                      |     |      | 1.7-23  |      | [5] | 435   | 429-435 | 29.0 | [5] |
|                              |                      |     |      |         |      |     | 410   | 320-530 | 18   | [6] |
|                              |                      |     | 29   |         | 0.47 | [4] | 280   |         | 4.9  | [4] |
|                              |                      |     | 9.7  | 1.0-16  | 49   | [1] | 114   |         | 10   | [2] |
| AR8                          | Ethylbenzene         | 106 |      |         |      |     | 101   | 83-142  | 22   | [6] |
|                              |                      |     |      |         |      |     | 132   | 128-132 | 7.0  | [5] |
|                              |                      |     | 8.5  |         | 0.13 | [4] | 79.6  |         | 1.4  | [4] |
|                              |                      |     | 25.9 | 7-35    | 35   | [1] | 365   |         | 23   | [2] |
|                              |                      |     |      |         |      |     | 300   | 260-400 | 17   | [6] |
| AR13                         | m,p-Xylene           | 106 |      |         |      |     | 383   | 371-383 | 20.0 | [5] |
|                              |                      |     | 25.6 |         | 0.45 | [4] | 238   |         | 4.8  | [4] |
|                              |                      |     | 6.9  | 1.2-10  | 41   | [1] | 73.4  |         | 5.9  | [2] |
|                              |                      |     |      |         |      |     |       |         |      |     |
|                              |                      |     |      |         |      |     |       |         |      |     |
| AR18                         | o-Xylene             | 106 |      |         |      |     |       |         |      |     |

|      |                               |       |      |           |      |      |      |         |      |          |
|------|-------------------------------|-------|------|-----------|------|------|------|---------|------|----------|
|      |                               |       | 6.1  |           | 0.15 | [4]  | 75.0 | 68-75   | 5.0  | [5]      |
| AR1  | 1,2,4-Trimethylbenzene        | 120.2 |      |           |      |      | 58.6 |         | 1.6  | [4]      |
|      |                               |       | 4.2  | 1.9–5.4   |      | 26   | 48.0 |         |      | 3.4 [2]  |
| AR2  | 1,3,5-Trimethylbenzene        | 120.2 | 0.85 | 0.17–1.59 |      | 55.0 | 64.0 | 57-74   | 6.0  | [5]      |
|      |                               |       | 1.38 |           | 0.05 |      | 12.9 |         |      | 0.7 [2]  |
| AR3  | 1,2,3-trimethylbenzene        | 120.2 |      |           |      |      | 13.8 |         | 0.6  | [4]      |
|      |                               |       | 3.36 |           | 0.11 |      | 43.3 |         |      | 2.4 [2]  |
| AR16 | n-Propylbenzene               | 120.2 | 1.88 | 1.14–2.28 |      | 19.4 | 32.7 |         | 1.2  | [4]      |
|      |                               |       | 1.04 |           | 0.08 |      | 14.8 |         |      | 1.3 [2]  |
| AR11 | iso-Propylbenzene             | 120.2 | 0.53 | 0.17–0.71 |      | 32.4 | 8.5  |         | 0.9  | [4]      |
|      |                               |       | 0.48 |           | 0.05 |      | 7.1  |         |      | 0.5 [2]  |
| AR4  | tert-Butylbenzene             | 134.2 | 0.63 | 0.25–0.79 |      | 28.4 | 5.1  |         | 0.7  | [4]      |
| AR6  | n-Butylbenzene                | 134.2 | 0.82 | 0.54–1.04 |      | 23.1 |      |         |      |          |
| AR23 | Toluene                       | 92    | 44.7 | 10.7–77.7 |      | 47.6 | 5.7  |         |      | 0.5 [2]  |
|      |                               |       |      | 3.4-46    |      |      | 792  |         |      | 61.3 [2] |
|      |                               |       |      |           |      |      | 863  | 821-863 | 43   | [5]      |
|      |                               |       |      |           |      |      | 660  | 570-860 |      | 16 [6]   |
|      |                               |       | 54.5 |           | 0.97 |      | 498  |         | 10.8 | [4]      |
| AR17 | o-ethyltoluene                | 120.2 |      |           |      |      | 21.2 |         |      | 2.1 [2]  |
| AR12 | m-Ethyltoluene                | 120.2 | 3.2  | 1.44–4.20 |      | 27.9 |      |         |      |          |
| AR19 | p-ethyltoluene                | 120.2 |      |           |      |      | 63.0 |         |      | 4.4 [2]  |
|      | p-isopropyltoluene (p-cymene) | 134.2 |      |           |      |      |      |         |      |          |
| AR20 |                               |       |      |           |      |      | 30.1 |         |      | 1.9 [2]  |
| AR21 | Styrene                       | 104   | 15.8 | 9.99–18.9 |      | 20.2 | 134  |         |      | 14 [2]   |
|      |                               |       |      |           |      |      | 147  | 122-191 |      | 17 [6]   |
|      |                               |       |      |           |      |      | 178  | 144-178 | 18.0 | [5]      |
|      |                               |       | 10.2 |           | 0.16 |      | 94.3 |         | 1.8  | [4]      |
| AR14 | naphthalene                   | 128.2 |      | 0.14-1.2  |      |      | 25.0 | 17-34   | 2    | [5]      |
|      |                               |       |      |           |      |      | 13.2 |         |      | 0.9 [2]  |
| AR15 | 2-methyl naphthalene          | 142   |      | 0.09-0.72 |      |      | 14.0 | 8-21    | 1.2  | [5]      |
| AR22 | 1-methyl naphthalene          | 142   |      |           |      |      | 13.0 | 8-20    | 1.1  | [5]      |

|                  |                   |       |      |           |      |     |      |           |      |     |
|------------------|-------------------|-------|------|-----------|------|-----|------|-----------|------|-----|
| AR5              | 2,5-Dimethylfuran | 96    | 21.0 | 8.58–30.5 | 36.5 | (1) | 211  |           | 15   | [2] |
| <b>ALKANES</b>   |                   |       |      |           |      |     |      |           |      |     |
| KA4              | n-heptane         | 100.2 |      |           |      |     | 27   |           | 2.4  | [2] |
| KA6              | n-octane          | 114.2 |      |           |      |     | 19   |           | 1.4  | [2] |
| KA5              | n-nonane          | 128.2 |      |           |      |     | 21   |           | 1.7  | [2] |
| KA3              | n-decane          | 142.2 |      |           |      |     | 11   |           | 0.8  | [2] |
| KA7              | n-undecane        | 156.2 |      |           |      |     | 6.2  |           | 0.6  | [2] |
| <b>ALKENES</b>   |                   |       |      |           |      |     |      |           |      |     |
| KE1              | 1,3-butadiene     | 54    |      |           |      |     | 394  | 281-394   | 43.0 | [5] |
|                  |                   |       | 40   | 1.1-17    |      | [5] | 373  |           | 12.6 | [4] |
| KE6              | 1-octene          | 112.2 |      |           |      |     | 53.9 |           | 5.4  | [2] |
| KE5              | 1-nonene          | 126.2 |      |           |      |     | 39.3 |           | 4.9  | [2] |
| <b>TERPENES</b>  |                   |       |      |           |      |     |      |           |      |     |
| TP2              | isoprene          | 68    |      |           |      |     | 2420 | 1990-2830 | 330  | [5] |
|                  |                   |       | 6570 | 7.6-167   |      | [5] | 6158 |           | 123  | [4] |
| TP1              | d-Limonene        | 136   | 34.2 | 19.2–43.9 |      | [1] | 475  |           | 50.3 | [2] |
|                  |                   |       |      |           |      |     | 410  | 340-480   | 11.0 | [6] |
|                  |                   |       | 29.1 |           | 0.49 | [4] | 269  |           | 5.3  | [4] |
| <b>NITRILES</b>  |                   |       |      |           |      |     |      |           |      |     |
| NL1              | acetonitrile      | 41    |      |           |      |     | 850  | 812-858   | 140  | [5] |
|                  |                   |       | 118  | 3.6-4     |      | [5] | 1145 |           | 45   | [4] |
| NL2              | acrylonitrile     | 53    |      |           |      |     | 207  | 161-207   | 13   | [5] |
| <b>PHENOLS</b>   |                   |       |      |           |      |     |      |           |      |     |
| PH1              | phenol            |       |      |           |      |     | 47   |           | 9.7  | [2] |
|                  |                   |       |      |           |      |     | 98   | 49-175    | 12   | [5] |
| PH2              | o-cresol          | 108.4 |      |           |      |     | 12   | 7-21      | 0.9  | [5] |
| PH3              | m,p-cresol        | 108.4 |      |           |      |     | 22   | 12-41     | 1.0  | [5] |
| PH4              | catechol          | 110   | 1.24 |           | 0.04 | [4] | 11   |           | 0.5  | [4] |
| <b>CARBONYLS</b> |                   |       |      |           |      |     |      |           |      |     |
| CB6              | acrolein          | 56    |      |           |      |     | 557  | 404-557   | 95   | [5] |

|     |              |     |     |   |     |      |          |     |     |
|-----|--------------|-----|-----|---|-----|------|----------|-----|-----|
| CB7 | benzaldehyde | 106 |     |   |     | 88   |          | 3.5 | [2] |
| CB5 | acetophenone | 120 |     |   |     | 65   |          | 3.4 | [2] |
| CB8 | formaldehyde | 30  |     |   |     | 1310 | 960-1880 | 27  | [6] |
|     |              |     | 143 | 3 | [4] | 1333 |          | 34  | [4] |
| CB3 | acetaldehyde | 44  | 268 | 6 | [4] | 2496 |          | 55  | [4] |
| CB4 | acetone      | 58  |     |   |     | 1190 | 930-1560 | 18  | [6] |
|     |              |     | 116 | 5 | [4] | 1069 |          | 49  | [4] |
| CB2 | 2-butanone   | 72  |     |   |     | 290  | 240-390  | 19  | [6] |
|     |              |     |     |   |     | 315  | 275-327  | 25  | [5] |

Table 5S summarizes concentrations of VOCs and other pollutants present in SHS, determined in field measurements.

**TABLE 5S: Tobacco smoke VOC field measurements reported in the literature**

|                       |                   |       | SMOKING (µg/m³) |        |             |      | NON SMOKING (µg/m³) |        |           |      |            |      |
|-----------------------|-------------------|-------|-----------------|--------|-------------|------|---------------------|--------|-----------|------|------------|------|
| CODE                  | Analyte           | MW    | mean            | median | range       | SD   | mean                | median | range     | SD   | Conditions | Ref. |
| CRITERIA POLLUTANTS   |                   |       |                 |        |             |      |                     |        |           |      |            |      |
|                       | PM2.5             |       | 146             | 148    | 63-311      | 67   | 14.9                | 8.6    | 0.4-73    | 19.4 | (a)        | [7]  |
|                       | CO (ppm)          |       | 5.7             | 5.5    | 2.1-9.6     | 2.3  | 2.6                 | 2.1    | 0.4-7.9   | 1.9  | (a)        | [7]  |
| AMINES                |                   |       |                 |        |             |      |                     |        |           |      |            |      |
| NC1                   | 3-ethenylpyridine | 105.4 |                 |        | nd - 13.3   |      |                     |        |           |      | (b)        | [6]  |
|                       |                   |       | 0.8             | 0.3    | nd - 5.9    | 1.4  | nd                  | nd     | nd        | nd   | (c)        | [8]  |
| NC8                   | nicotine          | 162.3 | 1.86            |        | 1.3 - 2.4   |      | 0.02                |        | 0.01-0.03 |      | (h)        | [9]  |
| NC10                  | pyridine          | 79    |                 |        | nd - 7.1    |      |                     |        |           |      | (b)        | [6]  |
|                       |                   |       | 0.9             | 0.1    | nd - 6.6    | 1.6  | nd                  | nd     | nd        | nd   | (c)        | [8]  |
| NC11                  | pyrrole           | 67    |                 |        | nd - 9.4    |      |                     |        |           |      | (b)        | [6]  |
| AROMATIC HYDROCARBONS |                   |       |                 |        |             |      |                     |        |           |      |            |      |
| AR7                   | Benzene           | 78    | 1.65            | 1.39   | 0.4 - 5.4   | 1.11 |                     |        |           |      | (d)        | [10] |
|                       |                   |       | 5.79            | 5.71   | 1.7 - 11.8  | 3.04 |                     |        |           |      | (e)        | [9]  |
|                       |                   |       | 2.64            |        |             | 1.94 | 1.98                |        |           | 1.1  | (f)        | [2]  |
|                       |                   |       |                 |        | 4.7 - 14.8  |      |                     |        |           |      | (b)        | [6]  |
|                       |                   |       | 16.30           | 11.4   | 4.2 - 63.7  | 15.3 | 11.5                | 6.6    | 3.4 - 51  | 11.8 | (c)        | [8]  |
|                       |                   |       | 31.10           | 31.7   | 30.0 - 31.7 | 0.98 | nd                  | nd     | nd        | nd   | (g)        | [7]  |
| AR8                   | Ethylbenzene      | 106   | 1.94            | 1.54   | 1.01 - 7.95 | 1.51 |                     |        |           |      | (d)        | [9]  |
|                       |                   |       | 2.77            | 2.12   | 0.54 - 10.8 | 2.41 |                     |        |           |      | (e)        | [9]  |
|                       |                   |       |                 |        | 1.3 - 8.7   |      |                     |        |           |      | (b)        | [6]  |
|                       |                   |       | 1.90            | 1.5    | 0.6 - 5.9   | 1.2  | 2.7                 | 2.4    | 1.1 - 6.5 | 1.2  | (c)        | [8]  |
| AR13                  | m,p-Xylene        | 106   | 2.56            | 2.15   | 0.73 - 6.78 | 1.42 |                     |        |           |      | (d)        | [9]  |
|                       |                   |       | 8.87            | 6.68   | 1.74 - 38.6 | 8.65 |                     |        |           |      | (e)        | [9]  |
|                       |                   |       |                 |        | 3.9 - 32    |      |                     |        |           |      | (b)        | [6]  |

|         |                        |       |       |      |            |      |      |     |            |      |     |     |
|---------|------------------------|-------|-------|------|------------|------|------|-----|------------|------|-----|-----|
| AR18    | o-Xylene               | 106   | 5.70  | 4.7  | 1.8 - 21.6 | 3.8  | 8.7  | 7.6 | 3.4 - 20.9 | 4.1  | (c) | [8] |
|         |                        |       | 25.5  | 25   | 25 - 27    | 0.9  | nd   | nd  | nd         | nd   | (g) | [7] |
|         |                        |       | 1.39  | 1.19 | 0.34 - 4.1 | 0.8  |      |     |            |      | (d) | [9] |
|         |                        |       | 2.48  | 2.04 | 0.71 - 9.7 | 2.0  |      |     |            |      | (e) | [9] |
| AR1     | 1.2.4-Trimethylbenzene | 120.2 |       |      | 1.3 - 10   |      |      |     |            |      | (b) | [6] |
|         |                        |       | 1.40  | 1.2  | 0.4 - 6.3  | 1.1  | 2.5  | 2.2 | 1.0 - 6.0  | 1.3  | (c) | [8] |
|         |                        |       | 2.41  |      |            | 2.6  | 2.0  |     |            | 1.6  | (f) | [2] |
|         |                        |       | 1.2   | 0.6  | 0.3 - 5.1  | 1.4  | 2.2  | 1.4 | 0.6 - 8.6  | 2.1  | (c) | [8] |
| AR2     | 1.3.5-Trimethylbenzene | 120.2 | 6.1   | 8.3  | nd - 10    | 5.4  | nd   | nd  | nd         | nd   | (g) | [7] |
|         |                        |       | 0.8   |      |            | 0.8  | 0.7  |     |            | 0.55 | (f) | [2] |
| AR3     | 1,2,3-trimethylbenzene | 120.2 | 0.3   | 0.2  | 0.1 - 1.4  | 0.4  | 0.6  | 0.4 | 0.2 - 2.3  | 0.60 | (c) | [8] |
|         |                        |       | 0.77  |      |            | 0.7  | 0.7  |     |            | 0.88 | (f) | [2] |
| AR23    | Toluene                | 92    | 5.67  | 3.63 | 1.8 – 22   | 4.6  |      |     |            |      | (d) | [9] |
| AR17    | o-ethyltoluene         | 120.2 | 19.2  | 14.5 | 2.3 - 67   | 17.7 |      |     |            |      | (e) | [9] |
|         |                        |       |       |      | 7.6 - 49   |      |      |     |            |      | (b) | [6] |
|         |                        |       | 29.20 | 28.4 | 9.6 - 78   | 17.4 | 47   | 45  | 8.8 - 99   | 22   | (c) | [8] |
|         |                        |       | 57.20 | 58.3 | 53 - 60    | 3.5  | nd   | nd  | nd         | nd   | (g) | [7] |
| AR21    | Styrene                | 104   | 1.12  | 1.14 | 0.4 - 1.7  | 0.2  |      |     |            |      | (d) | [9] |
|         |                        |       | 1.50  | 0.98 | 0.34 - 6.9 | 1.5  |      |     |            |      | (e) | [9] |
| AR14    | naphthalene            | 128.2 | 0.62  |      |            | 0.57 | 0.61 |     |            | 0.58 | (f) | [2] |
|         |                        |       | 1.28  | 1.24 | 1.1 - 1.7  | 1.6  |      |     |            |      | (d) | [9] |
|         |                        |       | 4.05  | 3.17 | 0.8 - 12   | 2.9  |      |     |            |      | (e) | [9] |
|         |                        |       | 0.60  |      |            | 0.49 | 0.54 |     |            | 0.46 | (f) | [2] |
| AR5     | 2,5-Dimethylfuran      | 96    |       |      | 1.0 - 5.6  |      |      |     |            |      | (b) | [6] |
|         |                        |       | 0.80  | 0.5  | 0.2 - 3.4  | 0.8  | 0.7  | 0.4 | 0.3 - 3.2  | 0.7  | (c) | [8] |
|         |                        |       | 1.13  |      |            | 0.77 | 3.3  |     |            | 8.4  | (f) | [2] |
|         |                        |       | 0.5   | 0.5  | 0.2 - 1.4  | 0.3  | 1    | 0.5 | 0.2 - 6.0  | 1.3  | (c) | [8] |
| AR18    | o-Xylene               | 106   | 0.54  | 0.44 | nd - 1.4   | 0.39 |      |     |            |      | (d) | [9] |
|         |                        |       | 2.49  | 1.27 | 0.4 - 9.3  | 2.47 |      |     |            |      | (e) | [9] |
|         |                        |       | 0.20  |      |            | 0.31 | 0.02 |     |            | 0.09 | (f) | [2] |
| ALKANES |                        |       |       |      |            |      |      |     |            |      |     |     |



|                  |                     |       |      |      |            |      |     |     |           |     |     |     |
|------------------|---------------------|-------|------|------|------------|------|-----|-----|-----------|-----|-----|-----|
| KA4              | n-heptane           | 100.2 | 7.2  | 8.3  | nd - 13.3  | 6.7  | nd  | nd  | nd        | nd  | (g) | [7] |
| KA5              | n-nonane            | 128.2 | 1.0  |      |            | 1.0  | 1.9 |     |           | 3.1 | (f) | [2] |
| KA3              | n-decane            | 142.2 | 2.0  |      |            | 3.5  | 3.5 |     |           | 6.7 | (f) | [2] |
| KA7              | n-undecane          | 156.2 | 2.2  |      |            | 4.8  | 2.3 |     |           | 4.4 | (f) | [2] |
| <b>ALKENE</b>    |                     |       |      |      |            |      |     |     |           |     |     |     |
| KE1              | 1,3-butadiene       | 54    | 1.7  | 0.7  | 0.3 - 10   | 2.5  | 0.5 | 0.4 | 0.1 - 1.1 | 0.3 | (c) | [8] |
| <b>TERPENES</b>  |                     |       |      |      |            |      |     |     |           |     |     |     |
| TP1              | d-Limonene          | 136   | 32   |      |            | 38   | 38  |     |           | 50  | (f) | [2] |
|                  |                     |       |      |      | 7.0 - 82   |      |     |     |           |     | (b) | [6] |
|                  |                     |       | 189  | 217  | 67 - 283   | 111  | 123 | 85  | 83 - 200  | 66  | (g) | [7] |
| TP3              | alpha-pinene        | 136   | 3.3  | 0    | nd - 10    | 5.7  | 7.2 | 10  | nd - 11   | 6.3 | (g) | [7] |
| <b>CARBONYLS</b> |                     |       |      |      |            |      |     |     |           |     |     |     |
| CB7              | benzaldehyde        | 106   | 0.83 | 0.53 | 0.43 - 2.5 | 0.63 |     |     |           |     | (d) | [9] |
|                  |                     |       | 7.6  | 8.7  | nd - 15    | 5.9  |     |     |           |     | (e) | [9] |
| CB8              | formaldehyde        | 30    |      |      | 11.7 - 42  |      |     |     |           |     | (b) | [6] |
| CB4              | acetone             | 58    |      |      | 16 - 111   |      |     |     |           |     | (b) | [6] |
|                  |                     |       | 114  | 47   | 45 - 250   | 118  | 18  | 25  | nd - 31   | 16  | (g) | [7] |
| CB2              | 2-butanone          | 72    |      |      | nd - 10    |      |     |     |           |     | (b) | [6] |
| CB11             | methyl ethyl ketone | 72    | 16   | 16   | 15 - 18    | 1.6  | nd  | nd  | nd        | nd  | (g) | [7] |
| <b>OTHER</b>     |                     |       |      |      |            |      |     |     |           |     |     |     |
|                  | 1,4-dichlorobenzene | 147   | 3.9  | 0    | nd - 11    | 6.8  | 44  | 0   | nd - 132  | 76  | (g) | [7] |
|                  | 2-propanol          | 60    | 21   | 18   | nd - 45    | 22   | 54  | 60  | 28 - 73   | 23  | (g) | [7] |
|                  | ethyl acetate       | 88    | 64   | 55   | 51 - 86    | 19   | 57  | 47  | 38 - 87   | 25  | (g) | [7] |
|                  | iso-butanol         | 74    | 13   | 13   | 10 - 16    | 3.5  | 5   | nd  | nd - 15   | 8.7 | (g) | [7] |
|                  | tetrachloroethylene | 165   | 11   | nd   | nd - 11    | 6.8  | nd  | nd  | nd        | nd  | (g) | [7] |

(a) pre- and post-smoking ban (n = 17); (b) smoking rooms (n = 5); (c) 6 smoking homes vs. 6 non-smoking homes; (d) measured in the fall (n=21); (e) measured in the winter (n=20); (f) 19 smoking vs. 28 non-smoking; (g) pre- and post-smoking ban (n = 3); (h) 81 smoking homes vs. 50 non-smoking homes.

## REFERENCES

1. Xie J., Wang X., Sheng G., Bi X. and Fu J., 2003. Determination of tobacco smoking influence on volatile organic compounds constituents by indoor tobacco smoking simulation experiment. *Atmos. Environ.* 37, 3365-3374.
2. Charles S.M., Jia C., Batterman S.A. and Godwin C., 2008. VOC and particulate emissions from commercial cigarettes: analysis of 2,5-DMF as an ETS tracer. *Environ Sci Technol* 42, 1324-1331.
3. Petrick L.M., Sleiman M., Dubowski Y., Gundel L.A. and Destailats H., 2011. Tobacco smoke aging in the presence of ozone: A room-sized chamber study. *Atmospheric Environment* 45, 4959-4965.
4. Martin P., Heavner D.L., Nelson P.R., Maiolo K.C., Risner C.H., Simmons P.S., Morgan W.T. and Ogden M.W., 1997. Environmental tobacco smoke (ETS): a market cigarette study. *Environment International* 23, 75-90.
5. Singer B.C., Hodgson A.T., Guevarra K.S., Hawley E.L. and Nazaroff W.W., 2002. Gas-phase organics in environmental tobacco smoke. 1. Effects of smoking rate, ventilation, and furnishing level on emission factors. *Environmental Science & Technology* 36, 846-53.
6. Hodgson A.T., Daisey J.M., Mahanama K.R.R., TenBrink J. and Alevantis L.E., 1996. Use of volatile tracers to determine the contribution of environmental tobacco smoke to concentrations of volatile organic compounds in smoking environments. *Environment International* 22, 295-307.
7. Waring M.S. and Siegel J.A., 2007. An evaluation of the indoor air quality in barse before and after a smoking ban in Austin, Texas. *J. Exposure Sci. and Environ. Epidemiol.* 17, 260-268.
8. Kim Y.M., Harrad S. and Harrison R.M., 2001. Concentrations and sources of VOCs in urban domestic and public microenvironments. *Environ Sci Technol* 35, 997-1004.
9. Matt G.E., Quintana P.J., Zakarian J.M., Fortmann A.L., Chatfield D.A., Hoh E., Uribe A.M. and Hovell M.F., 2011. When smokers move out and non-smokers move in: residential thirdhand smoke pollution and exposure. *Tobacco Control* 20, DOI:10.1136/tc.2010.037382.
10. Alonso M., Godayol A., Antico E. and J.M. S., 2010. Assessment of environmental tobacco smoke contamination in public premises: significance of 2,5-dimethylfuran as an effective marker. *Environ Sci Technol* 44, 8289-8294.
11. Klepeis N.E., Apte M.G., Gundel L.A., Sextro R.G. and Nazaroff W.W., 2003. Determining size-specific emission factors for environmental tobacco smoke particles. *Aerosol Sci. Technol.* 37, 780-790.
12. Apte M.G., Gundel L.A., Hammond S.K., Dod R.L., Russell M.L., Singer B.C., Sohn M.D., Sullivan D.P., Chang G.M. and Sextro R.G., Indoor measurements of environmental tobacco smoke. 2004: Final Report to the Tobacco Related Disease Research Program, Award 6RD-0307, LBNL Report LBNL-49148 (May 2004). <http://energy.lbl.gov/ie/pdf/LBNL-49148.pdf>.
13. Nazaroff W.W. and Singer B.C., 2004. Inhalation of hazardous air pollutants from environmental tobacco smoke in US residences. *Journal of Exposure Analysis and Environmental Epidemiology* 14, S71-S77
